# Supplementary material for: Lasting Effects on Body Weight and Mammary Gland Gene Expression in Female Mice upon Early Life Exposure to n-3 but Not n-6 High-Fat Diets
Source: PubMed Central journal article supplement (PMC3567116; doi:10.1371/journal.pone.0055603), 2013-02-07
Supplement: pone.0055603.s002.pdf [file pone.0055603.s002.pdf]

**Table S2. Biological processes over-represented in genes differentially expressed in FO versus CO samples**

| GO Biological Process                                          | <i>P</i> -value<br>(FDR<0.001) | Count     |
|----------------------------------------------------------------|--------------------------------|-----------|
| regulation of biological quality                               | 6.496e-13                      | 52/2290   |
| cellular process                                               | 1.106e-12                      | 141/12523 |
| homeostatic process                                            | 1.422e-12                      | 36/1176   |
| small molecule metabolic process                               | 4.138e-12                      | 46/1930   |
| response to wounding                                           | 4.545e-12                      | 30/852    |
| response to stress                                             | 1.465e-11                      | 53/2567   |
| generation of precursor metabolites and energy                 | 1.544e-11                      | 21/417    |
| defense response                                               | 1.646e-11                      | 31/958    |
| immune system process                                          | 3.063e-11                      | 37/1378   |
| inflammatory response                                          | 9.065e-11                      | 22/508    |
| cell activation                                                | 1.166e-10                      | 21/465    |
| chemical homeostasis                                           | 4.502e-10                      | 27/839    |
| leukocyte activation                                           | 5.480e-10                      | 19/407    |
| localization                                                   | 7.808e-10                      | 64/3876   |
| neutrophil chemotaxis                                          | 1.408e-9                       | 8/43      |
| locomotory behavior                                            | 1.999e-9                       | 18/391    |
| T cell proliferation                                           | 2.972e-9                       | 8/47      |
| lipid metabolic process                                        | 3.995e-9                       | 29/1061   |
| cellular homeostasis                                           | 5.475e-9                       | 24/752    |
| cellular ion homeostasis                                       | 5.620e-9                       | 22/634    |
| developmental process                                          | 6.483e-9                       | 68/4481   |
| cellular chemical homeostasis                                  | 7.672e-9                       | 22/645    |
| lymphocyte activation                                          | 8.321e-9                       | 16/331    |
| leukocyte migration                                            | 9.457e-9                       | 10/104    |
| locomotion                                                     | 1.329e-8                       | 22/665    |
| metabolic process                                              | 1.383e-8                       | 107/9017  |
| ion homeostasis                                                | 1.878e-8                       | 22/678    |
| transport                                                      | 1.953e-8                       | 55/3316   |
| behavior                                                       | 2.068e-8                       | 23/743    |
| response to stimulus                                           | 2.649e-8                       | 73/5157   |
| establishment of localization                                  | 3.105e-8                       | 55/3360   |
| T cell activation                                              | 4.048e-8                       | 12/192    |
| activated T cell proliferation                                 | 5.328e-8                       | 5/14      |
| leukocyte mediated cytotoxicity                                | 7.015e-8                       | 6/28      |
| lymphocyte proliferation                                       | 7.656e-8                       | 6/70      |
| leukocyte chemotaxis                                           | 8.571e-8                       | 8/71      |
| oxidative phosphorylation                                      | 8.714e-8                       | 10/131    |
| mononuclear cell proliferation                                 | 1.069e-7                       | 8/73      |
| leukocyte proliferation                                        | 1.190e-7                       | 8/74      |
| ion transmembrane transport                                    | 1.836e-7                       | 16/414    |
| carboxylic acid metabolic process                              | 1.921e-7                       | 21/710    |
| oxoacid metabolic process                                      | 1.921e-7                       | 21/710    |
| cell chemotaxis                                                | 1.993e-7                       | 8/79      |
| organic acid metabolic process                                 | 2.311e-7                       | 21/718    |
| taxis                                                          | 2.402e-7                       | 12/226    |
| chemotaxis                                                     | 2.402e-7                       | 12/226    |
| cellular ketone metabolic process                              | 2.836e-7                       | 21/727    |
| energy coupled proton transport, down electrochemical gradient | 3.095e-7                       | 7/57      |
| ATP synthesis coupled proton transport                         | 3.095e-7                       | 7/57      |
| immune response                                                | 3.108e-7                       | 23/864    |

|                                                                    |          |          |
|--------------------------------------------------------------------|----------|----------|
| regulation of transport                                            | 4.115e-7 | 23/878   |
| multicellular organismal process                                   | 4.797e-7 | 78/6072  |
| leukocyte mediated immunity                                        | 6.338e-7 | 10/162   |
| death                                                              | 6.618e-7 | 24/973   |
| catabolic process                                                  | 8.388e-7 | 30/1441  |
| cation transport                                                   | 1.090e-6 | 20/723   |
| multicellular organismal development                               | 1.092e-6 | 59/4140  |
| monocarboxylic acid metabolic process                              | 1.215e-6 | 15/420   |
| oxidation reduction                                                | 1.228e-6 | 21/796   |
| anatomical structure development                                   | 1.332e-6 | 55/3758  |
| system development                                                 | 1.422e-6 | 52/3467  |
| cellular component movement                                        | 1.525e-6 | 20/739   |
| regulation of intracellular pH                                     | 1.978e-6 | 5/27     |
| cellular monovalent inorganic cation homeostasis                   | 2.007e-6 | 6/48     |
| cell death                                                         | 2.071e-6 | 23/965   |
| regulation of multicellular organismal process                     | 2.104e-6 | 32/1672  |
| immune response-activating cell surface receptor signaling pathway | 2.258e-6 | 7/76     |
| cell proliferation                                                 | 2.452e-6 | 19/695   |
| response to external stimulus                                      | 2.592e-6 | 23/978   |
| regulation of response to stimulus                                 | 2.921e-6 | 21/841   |
| cellular lipid metabolic process                                   | 3.625e-6 | 19/714   |
| immune response-regulating cell surface receptor signaling pathway | 3.775e-6 | 7/82     |
| localization of cell                                               | 3.836e-6 | 16/522   |
| cell motility                                                      | 3.836e-6 | 16/522   |
| regulation of response to stress                                   | 4.026e-6 | 16/524   |
| regulation of cellular pH                                          | 4.059e-6 | 5/31     |
| cell migration                                                     | 4.570e-6 | 15/468   |
| regulation of apoptosis                                            | 4.690e-6 | 26/1244  |
| alcohol metabolic process                                          | 4.703e-6 | 17/594   |
| regulation of localization                                         | 5.061e-6 | 25/1171  |
| homeostasis of number of cells                                     | 5.559e-6 | 9/162    |
| regulation of programmed cell death                                | 5.730e-6 | 26/1258  |
| myeloid leukocyte activation                                       | 6.059e-6 | 7/88     |
| cell killing                                                       | 6.203e-6 | 6/58     |
| regulation of cell death                                           | 7.276e-6 | 26/1275  |
| organ development                                                  | 7.290e-6 | 42/2681  |
| lymphocyte mediated immunity                                       | 7.442e-6 | 8/127    |
| regulation of cytokine production                                  | 7.705e-6 | 12/315   |
| positive regulation of immune response                             | 8.350e-6 | 11/265   |
| phagocytosis                                                       | 8.750e-6 | 7/93     |
| biological regulation                                              | 9.335e-6 | 103/9542 |
| cellular cation homeostasis                                        | 9.921e-6 | 14/438   |
| positive regulation of transport                                   | 9.921e-6 | 14/438   |
| cellular response to chemical stimulus                             | 1.141e-5 | 19/774   |
| positive regulation of response to stimulus                        | 1.156e-5 | 14/444   |
| positive regulation of phagocytosis                                | 1.307e-5 | 5/39     |
| electron transport chain                                           | 1.443e-5 | 8/139    |
| iron ion transport                                                 | 1.485e-5 | 5/40     |
| proton transport                                                   | 1.507e-5 | 7/101    |
| intracellular pH reduction                                         | 1.614e-5 | 4/20     |
| glycolipid metabolic process                                       | 1.680e-5 | 5/41     |
| immune effector process                                            | 1.688e-5 | 10/234   |
| hydrogen transport                                                 | 1.714e-5 | 7/103    |
| response to biotic stimulus                                        | 1.789e-5 | 18/728   |

|                                                          |          |         |
|----------------------------------------------------------|----------|---------|
| cellular extravasation                                   | 1.981e-5 | 4/21    |
| respiratory burst                                        | 1.981e-5 | 4/21    |
| small molecule biosynthetic process                      | 2.037e-5 | 16/597  |
| immune response-activating signal transduction           | 2.197e-5 | 7/107   |
| pH reduction                                             | 2.407e-5 | 4/22    |
| phagocytosis, engulfment                                 | 2.407e-5 | 4/22    |
| response to other organism                               | 2.442e-5 | 16/606  |
| cation homeostasis                                       | 2.501e-5 | 14/476  |
| monovalent inorganic cation homeostasis                  | 2.559e-5 | 6/74    |
| response to lipopolysaccharide                           | 2.593e-5 | 10/246  |
| regulation of phagocytosis                               | 2.671e-5 | 5/45    |
| ion transport                                            | 2.691e-5 | 21/974  |
| negative regulation of catabolic process                 | 2.982e-5 | 6/76    |
| monosaccharide metabolic process                         | 3.079e-5 | 11/305  |
| immune response-regulating signaling pathway             | 3.703e-5 | 7/116   |
| response to bacterium                                    | 3.885e-5 | 13/432  |
| ATP biosynthetic process                                 | 3.913e-5 | 7/117   |
| positive regulation of nitric oxide biosynthetic process | 4.487e-5 | 5/50    |
| cellular metabolic process                               | 4.702e-5 | 87/7860 |
| response to molecule of bacterial origin                 | 4.716e-5 | 10/264  |

---
